# Supplementary material
Source: PubMed Central journal article supplement (PMC7650187)

Additional file 4

Top purposes of social media platforms and most popular information offered on websites.

**Top purposes of the group's social media platforms**

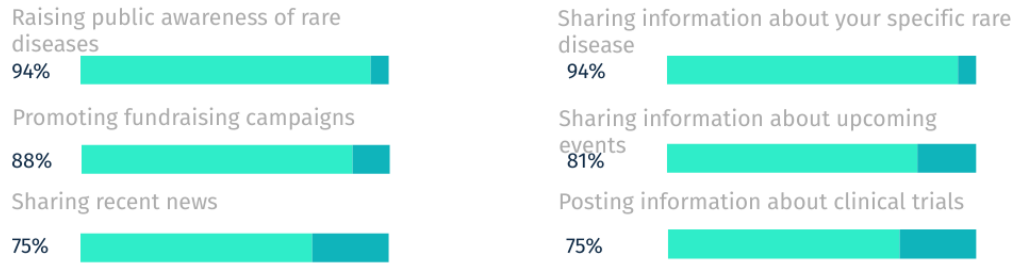

**Most popular information offered on the group websites**

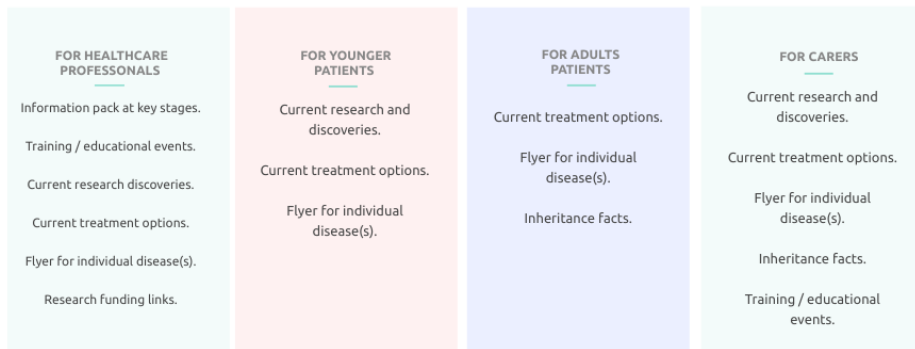

Supplement: 13023_2020_1559_MOESM4_ESM.pdf [file 13023_2020_1559_MOESM4_ESM.pdf]
