# Supplementary material
Source: PubMed Central journal article supplement (PMC7650187)

Distribution of 'registry' data

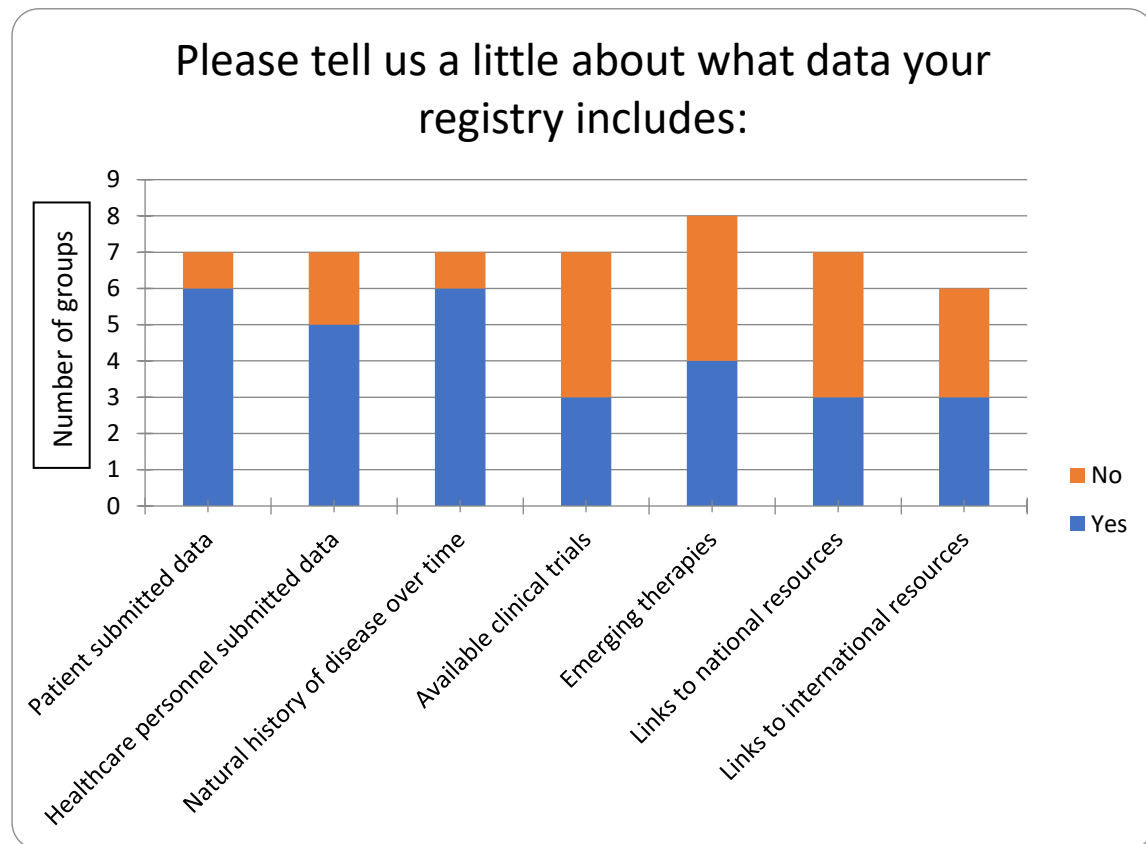

Supplement: 13023_2020_1559_MOESM6_ESM.pdf [file 13023_2020_1559_MOESM6_ESM.pdf]
