# Supplementary material
Source: PubMed Central journal article supplement (PMC7650187)

Additional file 9

Recommendations to inform health care policy and practice

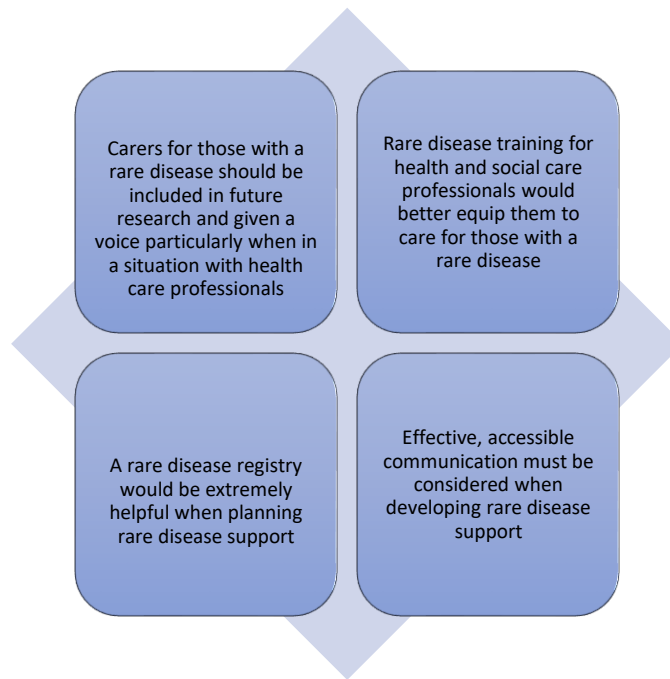

Supplement: 13023_2020_1559_MOESM9_ESM.pdf [file 13023_2020_1559_MOESM9_ESM.pdf]
